# Supplementary material for: Designed synthesis of ultrafine NiO nanocrystals bonded on a three dimensional graphene framework for high-capacity lithium-ion batteries
Source: Royal Society of Chemistry journal article supplement (doi:10.1039/c8nj01330f), 2018-01-01
Supplement: c8nj01330f1.pdf [file c8nj01330f1.pdf]

## Designed synthesis of ultrafine NiO nanocrystals bonded on three dimensional graphene framework for high-capacity lithium-ion batteries

Jiayuan Chen <sup>a,b</sup>, Xiaofeng Wu <sup>a,c\*</sup>, Qiangqiang Tan <sup>a</sup> and Yunfa Chen <sup>a,c\*</sup>

<sup>a</sup> State Key Laboratory of Multi-phase Complex Systems, Institute of Process Engineering, Chinese Academy of Sciences, Beijing 100190, China

<sup>b</sup> University of Chinese Academy of Sciences, No. 19A Yuquan Road, Beijing 100049, China

<sup>c</sup> Center for Excellence in Urban Atmospheric Environment, Institute of Urban Environment, Chinese Academy of Sciences, Xiamen 361021, China

\*Corresponding Authors: wxftsjc@ipe.ac.cn or chenylf@ipe.ac.cn.

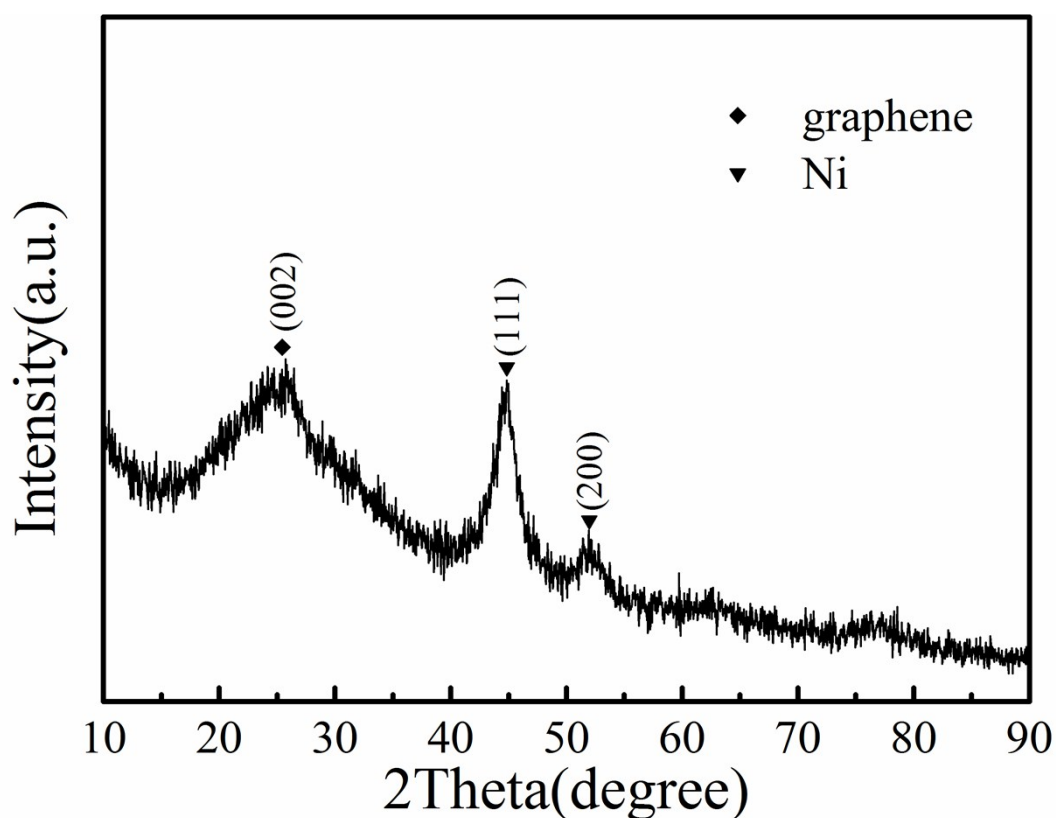

Fig. S1 XRD patterns of Ni/3D-GF hybrid derived from Ni precursor/3D-GF at 450 °C under Ar atmosphere.

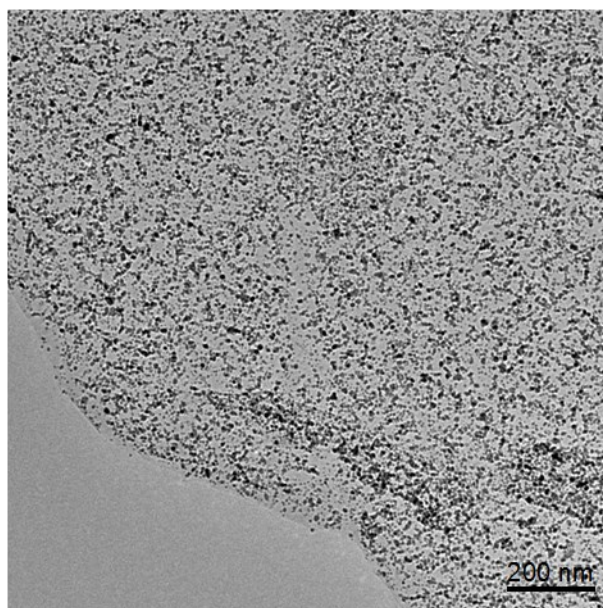

Fig. S2 TEM image of the Ni/3D-GF hybrid.

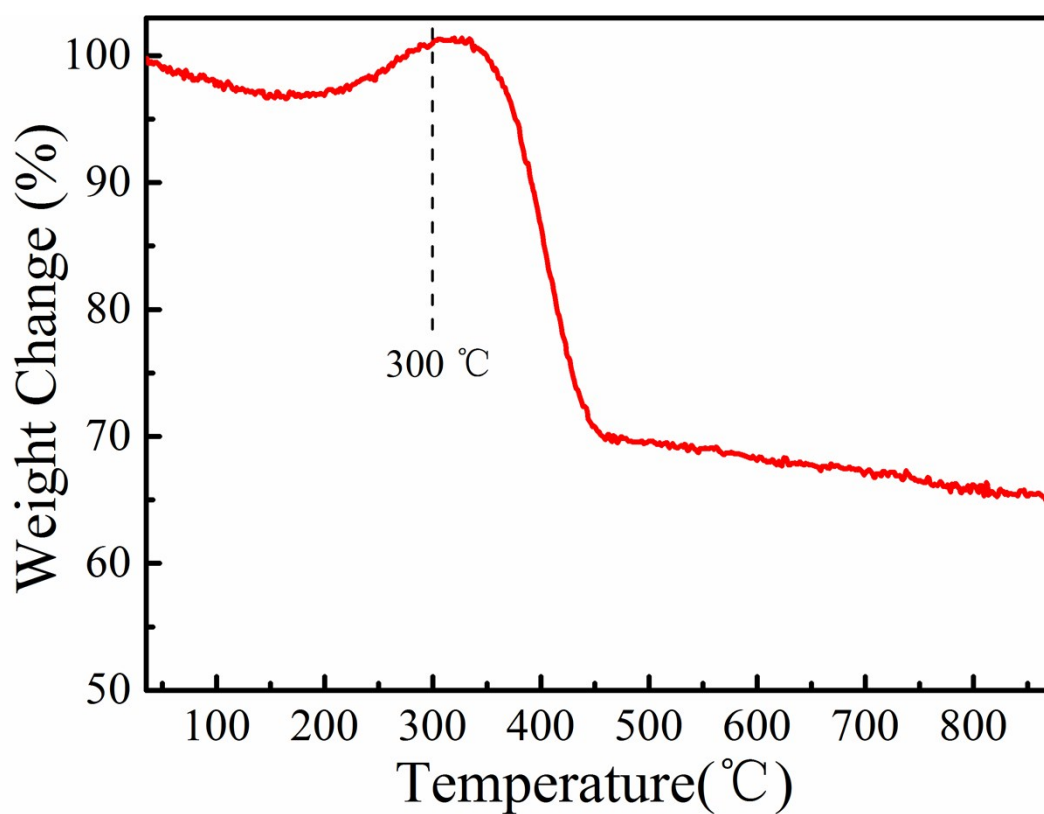

Fig. S3 Thermogravimetric (TG) curve of the Ni/3D-GF hybrid under air atmosphere at a heating rate of  $10\text{ }^{\circ}\text{C min}^{-1}$ . It shows that Ni can be adequately oxidized at  $300\text{ }^{\circ}\text{C}$ . Meanwhile, this also prevents the decomposition of the graphene.

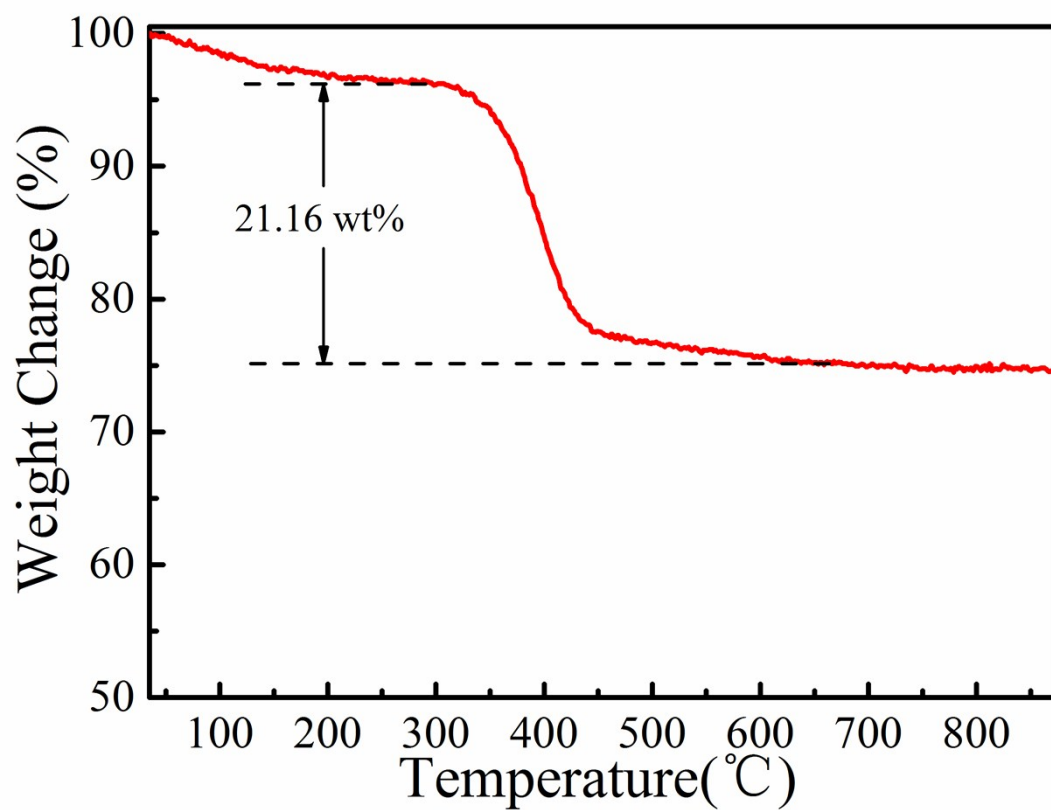

Fig. S4 Thermogravimetric (TG) curve of the NiO/3D-GF hybrid under air atmosphere at a heating rate of  $10\text{ }^{\circ}\text{C min}^{-1}$ .
